# Supplementary material
Source: bioRxiv or medRxiv preprint supplement (https://www.biorxiv.org/highwire/filestream/13460/field_highwire_adjunct_files/3/049478-4.pdf)

# Supplementary Figure 3

## B7

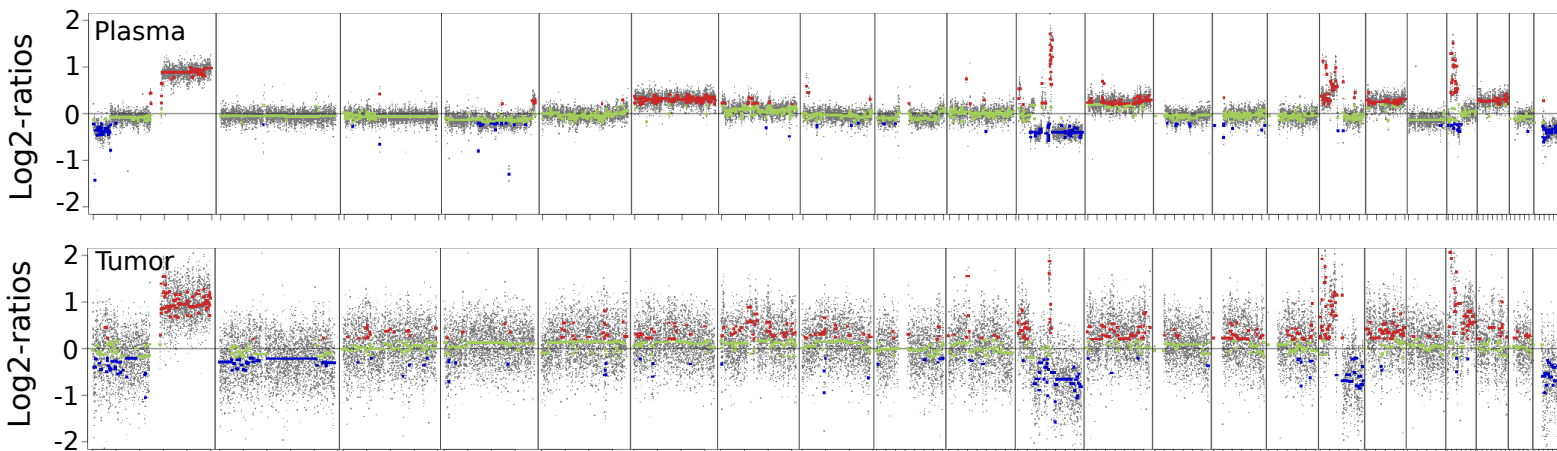

## B13

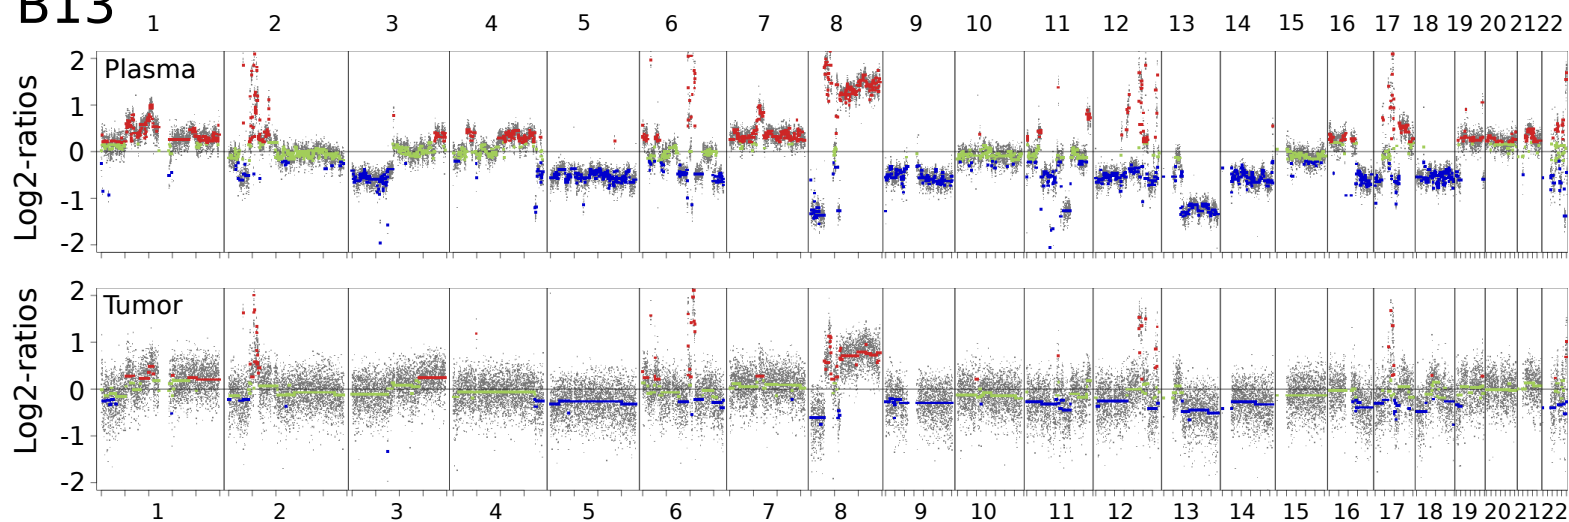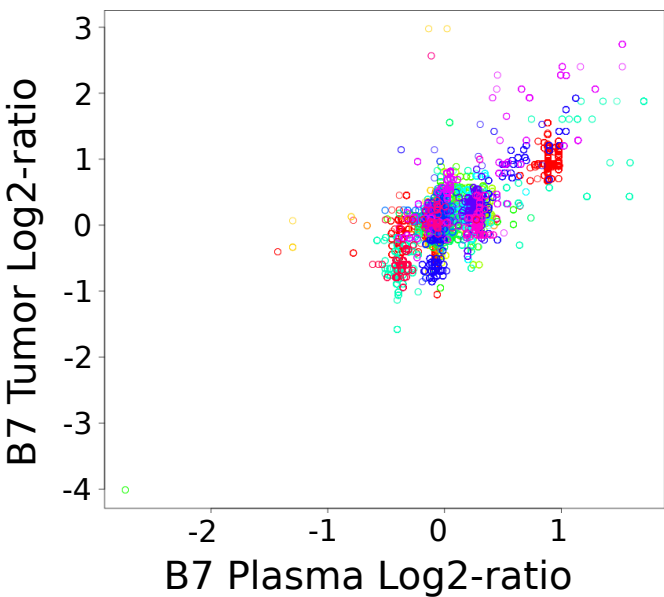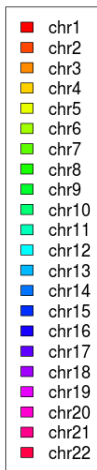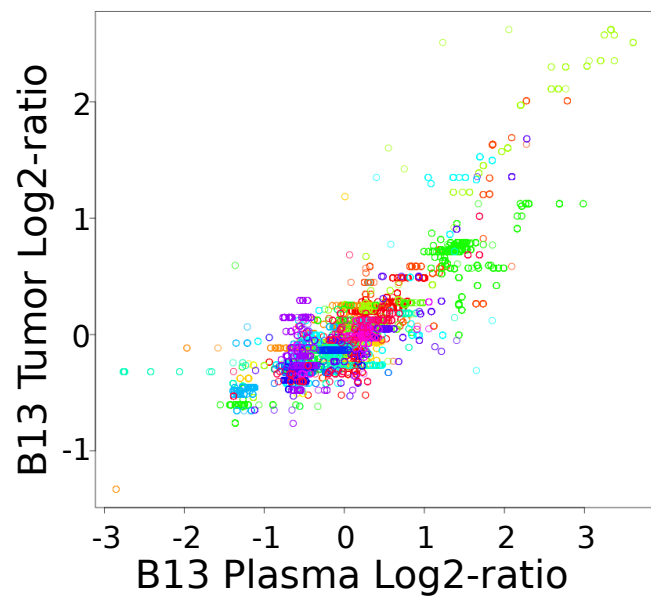

Supplement: Supplementary file [file 049478-4.pdf]
